# Supplementary material for: Proteobacteria Overgrowth and Butyrate-Producing Taxa Depletion in the Gut Microbiota of Glycogen Storage Disease Type 1 Patients
Source: PubMed Central journal article supplement (PMC7240959; doi:10.3390/metabo10040133), 2020-03-30
Supplement: metabolites-10-00133-s001.pdf [file metabolites-10-00133-s001.pdf]

## Supplementary Materials

**Table 1. Blood biochemical parameters in GSD patients.** Values are expressed as mean (standard deviation). Reference values are reported.

|                                | <b>GSD<br/>Mean (SD)</b> | <b>GSD Ia<br/>Mean (SD)</b> | <b>GSD Ib<br/>Mean (SD)</b> | <b>Reference<br/>values</b> |
|--------------------------------|--------------------------|-----------------------------|-----------------------------|-----------------------------|
| <b>Glucose, fasting</b>        | 71.38 (10.28)            | 65.50 (7.05)                | 80.00 (10.79)               | 70–105 mg/dL                |
| <b>Insulin, fasting</b>        | 5.88 (9.74)              | 2.45 (2.86)                 | 8.96 (11.70)                | 0-25 uU/ml                  |
| <b>HOMA-IR</b>                 | 1.10 (1.89)              | 0.42 (0.54)                 | 1.76 (2.26)                 |                             |
| <b>QUICKI Index</b>            | 0.47 (0.12)              | 0.53 (0.13)                 | 0.39 (0.07)                 |                             |
| <b>HOMA-<math>\beta</math></b> | 1.64 (2.59)              | 0.76 (0.77)                 | 2.37 (3.14)                 |                             |
| <b>Tyg-Index</b>               | 3.95 (0.42)              | 4.18 (0.39)                 | 3.80 (0.35)                 |                             |
| <b>Cholesterol, total</b>      | 206.75 (124.68)          | 265.50 (152.17)             | 166.40 (68.02)              | < 200 mg/dl                 |
| <b>Triglycerides</b>           | 300.25 (225.92)          | 422.50 (241.58)             | 204.60 (138.56)             | <150 mg/dL                  |
| <b>Uric acid</b>               | 6.675 (1.03)             | 7.10 (0.50)                 | 6.25 (3.02)                 | 2.5–8 mg/dL                 |
| <b>Serum lactate</b>           | 3.00 (1.77)              | 3.85 (1.93)                 | 2.14 (1.10)                 | 0.7-2.1<br>mmol/L           |
| <b>AST</b>                     | 42.5 (23.84)             | 54.50 (28.35)               | 37.80 (19.25)               | 0–35 U/L                    |
| <b>ALT</b>                     | 54.13 (43.44)            | 67.75 (47.13)               | 50.80 (42.36)               | 0–35 U/L                    |

**Table 2. Fecal SCFA concentrations.** For each experimental group, mean and standard deviation from Mann-Whitney test are reported. Values are expressed as mean (standard deviation). P-values <0.05 were considered significant.

|                            | <b>HC<br/>Mean (SD)</b> | <b>GSD<br/>Mean (SD)</b> | <b>p-value</b> |
|----------------------------|-------------------------|--------------------------|----------------|
| <b>Acetate</b>             | 1.84 (0.73)             | 3.54 (1.95)              | 0.0310*        |
| <b>Propionate</b>          | 0.72 (0.24)             | 1.41 (1.07)              | 0.0381*        |
| <b><i>iso</i>-butyrate</b> | 0.29 (0.12)             | 0.28 (0.22)              | 0.8965         |
| <b>Butyrate</b>            | 0.32 (0.12)             | 0.33 (0.22)              | 0.8381         |
| <b><i>iso</i>-valerate</b> | 0.24 (0.11)             | 0.19 (0.16)              | 0.3598         |
| <b>Total SCFAs</b>         | 3.40 (0.85)             | 5.75 (2.88)              | 0.0159*        |
